# Supplementary material for: Knockdown of <i>Foxg1</i> in Sox9+ supporting cells increases the trans-differentiation of supporting cells into hair cells in the neonatal mouse utricle
Source: publisher site journal article supplement (doi:10.18632/aging.104009), 2020-10-24
Supplement: Supplementary file [file aging-v12i20-104009-supplementary-material-SD1.pdf]

SUPPLEMENTARY FIGURES

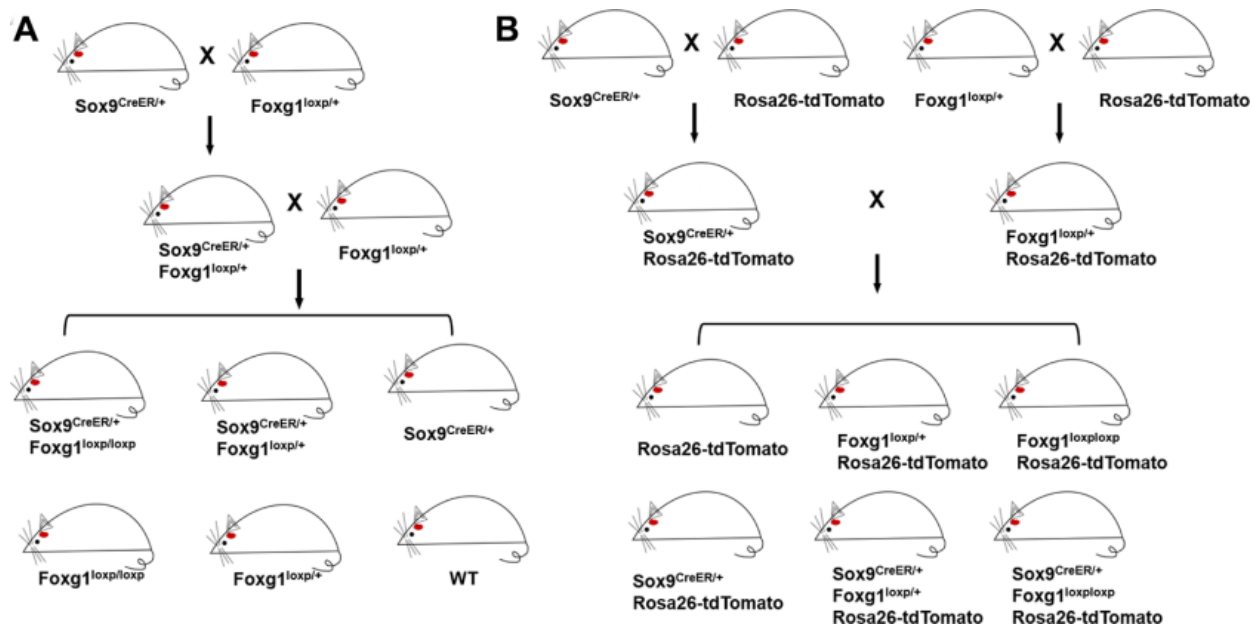

**Supplementary Figure 1. The mouse breeding strategy.** (A) Breeding strategy for Sox9<sup>CreER/+</sup>Foxg1<sup>loxpi/loxpi</sup> mice. (B) Breeding strategy for Sox9<sup>CreER/+</sup>Foxg1<sup>loxpi/loxpi</sup>Rosa26-tdTomato mice.

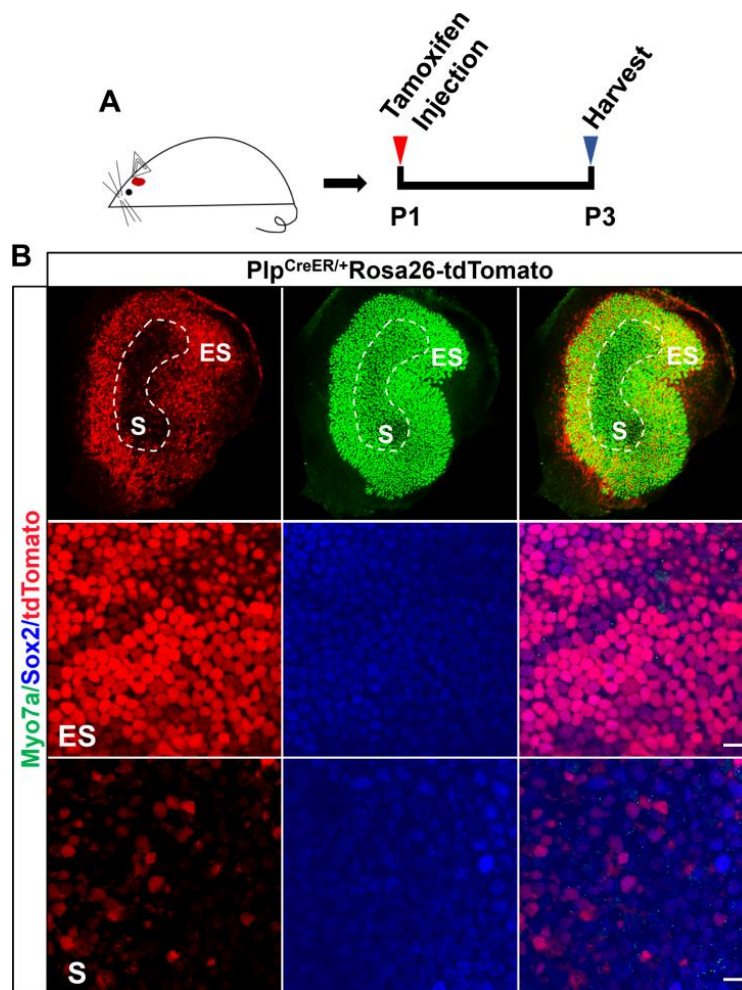

**Supplementary Figure 2. Expression of Plp and Sox2 in the neonatal mouse utricule.** (A) Tamoxifen was i.p. injected into P1 Plp9<sup>CreER/+</sup>Rosa26-tdTomato mice to activate the Cre enzyme, and the mice were sacrificed at P3. (B) Lineage tracing images of Plp+ SCs (red) in Plp9<sup>CreER/+</sup>Rosa26-tdTomato mice. Myo7a (green) and Sox2 (blue) were used as HC and SC markers, respectively. For all experiments, the scale bar at high magnification is 10  $\mu$ m.
